# Supplementary material
Source: publisher figshare collection journal article supplement (https://tandf.figshare.com/ndownloader/files/18666446)
Supplement: Supplementary file 1 [file 18666446]

## Supplementary Material

### *Demonstration of Water Extraction Charge Calculator using a Hypothetical Permit to Take Water Applicant*

#### A. User Defined Inputs for Calculation of Base Provincial Charge

1. Water use sectors liable to pay water extraction charges (chosen from drop-down list): **All permit liable sectors\***

\* in this example, sectors that do not require a permit are exempt i.e. domestic use, livestock/poultry watering, firefighting/other emergency services, wetland conservation or water diversions for construction purposes

| Bulk Water Charges Calculator for Ontario                            |                                                                                                                                                                                             |                                                                              |                                     |  |
|----------------------------------------------------------------------|---------------------------------------------------------------------------------------------------------------------------------------------------------------------------------------------|------------------------------------------------------------------------------|-------------------------------------|--|
| <b>USER INPUTS FOR PROVINCIAL BASE CHARGE CALCULATION</b>            |                                                                                                                                                                                             |                                                                              |                                     |  |
| Choose Target Water Use Sectors liable for water charges             | All Permit Liable Sectors                                                                                                                                                                   | Average Volume Extracted by Sectors<br>23191.05 Million m <sup>3</sup> /year |                                     |  |
| Choose Cost Category for Recovery                                    | Industrial and Commercial (excluding Thermal Power Generation)<br>Industrial and Commercial (including Thermal Power Generation)<br>Industrial, Commercial, Thermal Power, and Agricultural | 5.19 Million \$                                                              |                                     |  |
| Base Price for Ontario                                               | ✓ All Permit Liable Sectors<br>All Water Use Sectors                                                                                                                                        |                                                                              |                                     |  |
| <b>USER INPUTS FOR FULL BULK WATER EXTRACTION CHARGE CALCULATION</b> |                                                                                                                                                                                             |                                                                              |                                     |  |
| Select Main Watershed                                                | Select from List                                                                                                                                                                            |                                                                              |                                     |  |
| Select SubWatershed                                                  | Select from List                                                                                                                                                                            |                                                                              |                                     |  |
| Select Water Use Sector                                              | Select from List                                                                                                                                                                            |                                                                              |                                     |  |
| Enter Volume of Water to be Extracted (Self Supplied)                |                                                                                                                                                                                             | Million Litres/ day                                                          | 1 meter <sup>3</sup> = 1,000 Liters |  |
| Enter Days in a Year for Water Extraction                            |                                                                                                                                                                                             | Days/year                                                                    |                                     |  |
| Enter Number of Low Precipitation Months                             |                                                                                                                                                                                             | months                                                                       |                                     |  |
| Select Source of Water                                               | Select from List                                                                                                                                                                            |                                                                              |                                     |  |

2. Programs to be considered for cost recovery (chosen from drop-down list): **All water resource management costs (including extreme contamination events for contingency)**

| Bulk Water Charges Calculator for Ontario                                                                     |                                                                                                                                                                                                                                                                                                                                                                                                                                                                                                                                                           |                                            |                                     |                              |
|---------------------------------------------------------------------------------------------------------------|-----------------------------------------------------------------------------------------------------------------------------------------------------------------------------------------------------------------------------------------------------------------------------------------------------------------------------------------------------------------------------------------------------------------------------------------------------------------------------------------------------------------------------------------------------------|--------------------------------------------|-------------------------------------|------------------------------|
| <div>Click on individual grey cells to view the selection lists. Blue Cells need manual entry of values</div> |                                                                                                                                                                                                                                                                                                                                                                                                                                                                                                                                                           |                                            |                                     |                              |
| <b>USER INPUTS FOR PROVINCIAL BASE CHARGE CALCULATION</b>                                                     |                                                                                                                                                                                                                                                                                                                                                                                                                                                                                                                                                           |                                            |                                     |                              |
| Choose Target Water Use Sectors liable for water charges                                                      | All Permit Liable Sectors                                                                                                                                                                                                                                                                                                                                                                                                                                                                                                                                 | Average Volume Extracted by Sectors Chosen | 23191.05                            | Million m <sup>3</sup> /year |
| Choose Cost Category for Recovery                                                                             | All Water Management Programs (Quality, Quantity, Contingency)                                                                                                                                                                                                                                                                                                                                                                                                                                                                                            | Total Cost to be recovered                 | 535.19                              | Million \$                   |
| Base Price for Ontario                                                                                        |                                                                                                                                                                                                                                                                                                                                                                                                                                                                                                                                                           |                                            |                                     |                              |
| <b>USER INPUTS FOR FULL BULK WATER EXTRACTION CHARGE CALCULATION</b>                                          |                                                                                                                                                                                                                                                                                                                                                                                                                                                                                                                                                           |                                            |                                     |                              |
| Select Main Watershed                                                                                         | <div>Business as Usual MOECC Water Quantity and PTTW<br/>Water Resource Management, Source Water Protection and Clean Water<br/>Water Resource Management, Source Water Protection, Clean Water, Great Lakes Initiatives<br/>Water Resource Management, Source Water Protection, Clean Water, Extreme Contamination Contin<br/>✓ All Water Management Programs (Quality, Quantity, Contingency)<br/>Water Resource Management, Source Water Protection Program Only<br/>Water Resource Management, Source Water Protection, Great Lakes Initiatives</div> |                                            |                                     |                              |
| Select SubWatershed                                                                                           |                                                                                                                                                                                                                                                                                                                                                                                                                                                                                                                                                           |                                            |                                     |                              |
| Select Water Use Sector                                                                                       |                                                                                                                                                                                                                                                                                                                                                                                                                                                                                                                                                           |                                            |                                     |                              |
| Enter Volume of Water to be Extracted (Self Supplied)                                                         |                                                                                                                                                                                                                                                                                                                                                                                                                                                                                                                                                           | Million Litres/ day                        | 1 meter <sup>3</sup> = 1,000 Liters |                              |
| Enter Days in a Year for Water Extraction                                                                     |                                                                                                                                                                                                                                                                                                                                                                                                                                                                                                                                                           | Days/year                                  |                                     |                              |
| Enter Number of Low Precipitation Months                                                                      |                                                                                                                                                                                                                                                                                                                                                                                                                                                                                                                                                           | months                                     |                                     |                              |
| Select Source of Water                                                                                        | Select from List                                                                                                                                                                                                                                                                                                                                                                                                                                                                                                                                          |                                            |                                     |                              |

## B. User defined Inputs for Full Bulk Water Extraction Charge

1. Main Watershed of the proposed location for extraction (chosen from drop-down list): **Lake Erie**

| Bulk Water Charges Calculator for Ontario                                                                     |                                                                                                                         |                                            |                                     |                              |
|---------------------------------------------------------------------------------------------------------------|-------------------------------------------------------------------------------------------------------------------------|--------------------------------------------|-------------------------------------|------------------------------|
| <div>Click on individual grey cells to view the selection lists. Blue Cells need manual entry of values</div> |                                                                                                                         |                                            |                                     |                              |
| <b>USER INPUTS FOR PROVINCIAL BASE CHARGE CALCULATION</b>                                                     |                                                                                                                         |                                            |                                     |                              |
| Choose Target Water Use Sectors liable for water charges                                                      | All Permit Liable Sectors                                                                                               | Average Volume Extracted by Sectors Chosen | 23191.05                            | Million m <sup>3</sup> /year |
| Choose Cost Category for Recovery                                                                             | All Water Management Programs (Quality, Quantity, Contingency)                                                          | Total Cost to be Recovered                 | 535.19                              | Million \$                   |
| Base Price for Ontario 0.0231 \$/ m <sup>3</sup>                                                              |                                                                                                                         |                                            |                                     |                              |
| <b>USER INPUTS FOR FULL BULK WATER EXTRACTION CHARGE CALCULATION</b>                                          |                                                                                                                         |                                            |                                     |                              |
| Select Main Watershed                                                                                         | Lake_Erie                                                                                                               |                                            |                                     |                              |
| Select SubWatershed                                                                                           | <div>Select from List<br/>Lake_Erie<br/>Lake_Ontario<br/>St_Lawrence_OttawaRiver<br/>Lake_Huron<br/>Lake_Superior</div> |                                            |                                     |                              |
| Select Water Use Sector                                                                                       |                                                                                                                         |                                            |                                     |                              |
| Enter Volume of Water to be Extracted (Self Supplied)                                                         |                                                                                                                         | Million Litres/ day                        | 1 meter <sup>3</sup> = 1,000 Liters |                              |
| Enter Days in a Year for Water Extraction                                                                     |                                                                                                                         | Days/year                                  |                                     |                              |
| Enter Number of Low Precipitation Months                                                                      |                                                                                                                         | months                                     |                                     |                              |
| Select Source of Water                                                                                        | Select from List                                                                                                        |                                            |                                     |                              |

2. Sub-watershed of the proposed location (chosen from drop-down list filtered automatically based on input provided in step 1.): **Grand River**

| Bulk Water Charges Calculator for Ontario                                                                         |                                                                                                                                                                                                                                           |                                            |                                     |                              |  |
|-------------------------------------------------------------------------------------------------------------------|-------------------------------------------------------------------------------------------------------------------------------------------------------------------------------------------------------------------------------------------|--------------------------------------------|-------------------------------------|------------------------------|--|
| <div>Click on individual grey cells to view the selection lists.<br/>Blue Cells need manual entry of values</div> |                                                                                                                                                                                                                                           |                                            |                                     |                              |  |
| <b>USER INPUTS FOR PROVINCIAL BASE CHARGE CALCULATION</b>                                                         |                                                                                                                                                                                                                                           |                                            |                                     |                              |  |
| Choose Target Water Use Sectors liable for water charges                                                          | All Permit Liable Sectors                                                                                                                                                                                                                 | Average Volume Extracted by Sectors Chosen | 23191.05                            | Million m <sup>3</sup> /year |  |
| Choose Cost Category for Recovery                                                                                 | All Water Management Programs (Quality, Quantity, Contingency)                                                                                                                                                                            | Total Cost to be Recovered                 | 535.19                              | Million \$                   |  |
| Base Price for Ontario                                                                                            | 0.0231                                                                                                                                                                                                                                    | \$/ m <sup>3</sup>                         |                                     |                              |  |
| <b>USER INPUTS FOR FULL BULK WATER EXTRACTION CHARGE CALCULATION</b>                                              |                                                                                                                                                                                                                                           |                                            |                                     |                              |  |
| Select Main Watershed                                                                                             | Lake_Erie                                                                                                                                                                                                                                 |                                            |                                     |                              |  |
| Select SubWatershed                                                                                               | Grand River                                                                                                                                                                                                                               |                                            |                                     |                              |  |
| Select Water Use Sector                                                                                           | <div> <div>Select from List</div> <div> <div>Essex</div> <div>St. Clair</div> <div>Lower Thames</div> <div>Upper Thames</div> <div>Kettle Creek</div> <div>Catfish Creek</div> <div>Long point</div> <div>Grand River</div> </div> </div> |                                            |                                     |                              |  |
| Enter Volume of Water to be Extracted (Self Supplied)                                                             |                                                                                                                                                                                                                                           | Million Litres/ day                        | 1 meter <sup>3</sup> = 1,000 Liters |                              |  |
| Enter Days in a Year for Water Extraction                                                                         |                                                                                                                                                                                                                                           | Days/year                                  |                                     |                              |  |
| Enter Number of Low Precipitation Months                                                                          |                                                                                                                                                                                                                                           | months                                     |                                     |                              |  |
| Select Source of Water                                                                                            | ✓ Grand River                                                                                                                                                                                                                             |                                            |                                     |                              |  |

3. The water use sector (chosen from drop-down list): **Water bottling**

| Bulk Water Charges Calculator for Ontario                                                                         |                                                                                                                                                                                                                                                                                                                                                                                                                                                                                                                                                                                                                                                                                                                                                                                                                                                                                                                                                                                                                                                                                                                                                                                                                                                                                                                                                                                                                                                     |                                            |                                     |                              |  |
|-------------------------------------------------------------------------------------------------------------------|-----------------------------------------------------------------------------------------------------------------------------------------------------------------------------------------------------------------------------------------------------------------------------------------------------------------------------------------------------------------------------------------------------------------------------------------------------------------------------------------------------------------------------------------------------------------------------------------------------------------------------------------------------------------------------------------------------------------------------------------------------------------------------------------------------------------------------------------------------------------------------------------------------------------------------------------------------------------------------------------------------------------------------------------------------------------------------------------------------------------------------------------------------------------------------------------------------------------------------------------------------------------------------------------------------------------------------------------------------------------------------------------------------------------------------------------------------|--------------------------------------------|-------------------------------------|------------------------------|--|
| <div>Click on individual grey cells to view the selection lists.<br/>Blue Cells need manual entry of values</div> |                                                                                                                                                                                                                                                                                                                                                                                                                                                                                                                                                                                                                                                                                                                                                                                                                                                                                                                                                                                                                                                                                                                                                                                                                                                                                                                                                                                                                                                     |                                            |                                     |                              |  |
| <b>USER INPUTS FOR PROVINCIAL BASE CHARGE CALCULATION</b>                                                         |                                                                                                                                                                                                                                                                                                                                                                                                                                                                                                                                                                                                                                                                                                                                                                                                                                                                                                                                                                                                                                                                                                                                                                                                                                                                                                                                                                                                                                                     |                                            |                                     |                              |  |
| Choose Target Water Use Sectors liable for water charges                                                          | All Permit Liable Sectors                                                                                                                                                                                                                                                                                                                                                                                                                                                                                                                                                                                                                                                                                                                                                                                                                                                                                                                                                                                                                                                                                                                                                                                                                                                                                                                                                                                                                           | Average Volume Extracted by Sectors Chosen | 23191.05                            | Million m <sup>3</sup> /year |  |
| Choose Cost Category for Recovery                                                                                 | All Water Management Programs (Quality, Quantity, Contingency)                                                                                                                                                                                                                                                                                                                                                                                                                                                                                                                                                                                                                                                                                                                                                                                                                                                                                                                                                                                                                                                                                                                                                                                                                                                                                                                                                                                      | Total Cost to be Recovered                 | 535.19                              | Million \$                   |  |
| Base Price for Ontario                                                                                            | 0.0231                                                                                                                                                                                                                                                                                                                                                                                                                                                                                                                                                                                                                                                                                                                                                                                                                                                                                                                                                                                                                                                                                                                                                                                                                                                                                                                                                                                                                                              | \$/ m <sup>3</sup>                         |                                     |                              |  |
| <b>USER INPUTS FOR FULL BULK WATER EXTRACTION CHARGE CALCULATION</b>                                              |                                                                                                                                                                                                                                                                                                                                                                                                                                                                                                                                                                                                                                                                                                                                                                                                                                                                                                                                                                                                                                                                                                                                                                                                                                                                                                                                                                                                                                                     |                                            |                                     |                              |  |
| Select Main Watershed                                                                                             | Lake_Erie                                                                                                                                                                                                                                                                                                                                                                                                                                                                                                                                                                                                                                                                                                                                                                                                                                                                                                                                                                                                                                                                                                                                                                                                                                                                                                                                                                                                                                           |                                            |                                     |                              |  |
| Select SubWatershed                                                                                               | Grand River                                                                                                                                                                                                                                                                                                                                                                                                                                                                                                                                                                                                                                                                                                                                                                                                                                                                                                                                                                                                                                                                                                                                                                                                                                                                                                                                                                                                                                         |                                            |                                     |                              |  |
| Select Water Use Sector                                                                                           | <div> <div>Select from List</div> <div> <div>Water Bottling</div> <div>Fruit and Vegetable Canning or Pickling</div> <div>Beverage Manufacturing</div> <div>Ready-mix Concrete Manufacturing</div> <div>Non-metallic Mineral Product Manufacturing</div> <div>Pesticide, Fertilizer and other Agricultural Chemical Manufacturing</div> <div>Inorganic Chemical Manufacturing</div> <div>Golf Course Irrigation</div> <div>Dewatering - Pits, Quarries, Aggregate Washing</div> <div>Construction</div> <div>Mining and Oil and Gas</div> <div>Food Processing</div> <div>Primary Metal Manufacturing</div> <div>Textile and Textile Product mills</div> <div>Clothing Manufacturing</div> <div>Leather and Allied Product Manufacturing</div> <div>Wood Products Manufacturing</div> <div>Paper and Pulp Manufacturing</div> <div>Petroleum and Coal Manufacturing</div> <div>Plastics and Rubber Manufacturing</div> <div>Fabricated Metal Product Manufacturing</div> <div>Machinery Manufacturing</div> <div>Computer and Electronic Product Manufacturing</div> <div>Transportation Equipment Manufacturing</div> <div>Furniture and related Product Manufacturing</div> <div>Self Supply Commercial and Institutional</div> <div>Miscellaneous Manufacturing</div> <div>Thermal Power Generation</div> <div>Municipal Water Supply</div> <div>Domestic Self Supply</div> <div>Agriculture Irrigation</div> <div>Livestock</div> </div> </div> |                                            |                                     |                              |  |
| Enter Volume of Water to be Extracted (Self Supplied)                                                             |                                                                                                                                                                                                                                                                                                                                                                                                                                                                                                                                                                                                                                                                                                                                                                                                                                                                                                                                                                                                                                                                                                                                                                                                                                                                                                                                                                                                                                                     | Million Litres/ day                        | 1 meter <sup>3</sup> = 1,000 Liters |                              |  |
| Enter Days in a Year for Water Extraction                                                                         |                                                                                                                                                                                                                                                                                                                                                                                                                                                                                                                                                                                                                                                                                                                                                                                                                                                                                                                                                                                                                                                                                                                                                                                                                                                                                                                                                                                                                                                     | Days/year                                  |                                     |                              |  |
| Enter Number of Low Precipitation Months                                                                          |                                                                                                                                                                                                                                                                                                                                                                                                                                                                                                                                                                                                                                                                                                                                                                                                                                                                                                                                                                                                                                                                                                                                                                                                                                                                                                                                                                                                                                                     | months                                     |                                     |                              |  |
| Select Source of Water                                                                                            | Select from List                                                                                                                                                                                                                                                                                                                                                                                                                                                                                                                                                                                                                                                                                                                                                                                                                                                                                                                                                                                                                                                                                                                                                                                                                                                                                                                                                                                                                                    |                                            |                                     |                              |  |
| Total Volume of Water Extracted in a Year                                                                         |                                                                                                                                                                                                                                                                                                                                                                                                                                                                                                                                                                                                                                                                                                                                                                                                                                                                                                                                                                                                                                                                                                                                                                                                                                                                                                                                                                                                                                                     | 0 me                                       |                                     |                              |  |
| Sub Watershed Multipliers                                                                                         |                                                                                                                                                                                                                                                                                                                                                                                                                                                                                                                                                                                                                                                                                                                                                                                                                                                                                                                                                                                                                                                                                                                                                                                                                                                                                                                                                                                                                                                     |                                            |                                     |                              |  |

4. Volume of water to be extracted (entered manually in Million Liters/day): **3.6**  
(Million L/day)

5. Days in a year for water extraction (entered manually in days/year): **365**  
(days/year)

6. Number of months of low precipitation (entered manually): **4 (months)**

7. Source of water extraction (chosen from drop-down list): **Groundwater**

|                                                                      |                                                                                                                                                             |                                                                                                       |                                       |
|----------------------------------------------------------------------|-------------------------------------------------------------------------------------------------------------------------------------------------------------|-------------------------------------------------------------------------------------------------------|---------------------------------------|
| <b>USER INPUTS FOR PROVINCIAL BASE CHARGE CALCULATION</b>            |                                                                                                                                                             | Click on individual grey cells to view the selection lists.<br>Blue Cells need manual entry of values |                                       |
| Choose Target Water Use Sectors liable for water charges             | All Permit Liable Sectors                                                                                                                                   | Average Volume Extracted by Sectors Chosen                                                            | 23191.05 Million m <sup>3</sup> /year |
| Choose Cost Category for Recovery                                    | All Water Management Programs (Quality, Quantity, Contingency)                                                                                              | Total Cost to be Recovered                                                                            | 535.19 Million \$                     |
| Base Price for Ontario                                               | 0.0231                                                                                                                                                      | \$/ m <sup>3</sup>                                                                                    |                                       |
| <b>USER INPUTS FOR FULL BULK WATER EXTRACTION CHARGE CALCULATION</b> |                                                                                                                                                             |                                                                                                       |                                       |
| Select Main Watershed                                                | Lake_Erie                                                                                                                                                   |                                                                                                       |                                       |
| Select SubWatershed                                                  | Grand River                                                                                                                                                 |                                                                                                       |                                       |
| Select Water Use Sector                                              | Water Bottling                                                                                                                                              |                                                                                                       |                                       |
| Enter Volume of Water to be Extracted (Self Supplied)                | 3.6                                                                                                                                                         | Million Litres/ day                                                                                   | 1 meter <sup>3</sup> = 1,000 Liters   |
| Enter Days in a Year for Water Extraction                            | 365                                                                                                                                                         | Days/year                                                                                             |                                       |
| Enter Number of Low Precipitation Months                             | 4                                                                                                                                                           | months                                                                                                |                                       |
| Select Source of Water                                               | Groundwater                                                                                                                                                 |                                                                                                       |                                       |
| Total Volume of Water Extracted in a Year                            | Select from List<br>Surface Water<br><input checked="" type="checkbox"/> Groundwater 1314000 meter <sup>3</sup> /year<br>Both Groundwater and Surface Water |                                                                                                       |                                       |

**C. Outputs of Bulk Water Charge Calculator for inputs defined in Steps A and B**

| Bulk Water Charges Calculator for Ontario                            |                                                                |                                                                                                       |                                       |
|----------------------------------------------------------------------|----------------------------------------------------------------|-------------------------------------------------------------------------------------------------------|---------------------------------------|
| <b>USER INPUTS FOR PROVINCIAL BASE CHARGE CALCULATION</b>            |                                                                | Click on individual grey cells to view the selection lists.<br>Blue Cells need manual entry of values |                                       |
| Choose Target Water Use Sectors liable for water charges             | All Permit Liable Sectors                                      | Average Volume Extracted by Sectors Chosen                                                            | 23191.05 Million m <sup>3</sup> /year |
| Choose Cost Category for Recovery                                    | All Water Management Programs (Quality, Quantity, Contingency) | Total Cost to be Recovered                                                                            | 535.19 Million \$                     |
| Base Price for Ontario                                               | 0.0231                                                         | \$/ m <sup>3</sup>                                                                                    |                                       |
| <b>USER INPUTS FOR FULL BULK WATER EXTRACTION CHARGE CALCULATION</b> |                                                                |                                                                                                       |                                       |
| Select Main Watershed                                                | Lake_Erie                                                      |                                                                                                       |                                       |
| Select SubWatershed                                                  | Grand River                                                    |                                                                                                       |                                       |
| Select Water Use Sector                                              | Water Bottling                                                 |                                                                                                       |                                       |
| Enter Volume of Water to be Extracted (Self Supplied)                | 3.6                                                            | Million Litres/ day                                                                                   | 1 meter <sup>3</sup> = 1,000 Liters   |
| Enter Days in a Year for Water Extraction                            | 365                                                            | Days/year                                                                                             |                                       |
| Enter Number of Low Precipitation Months                             | 4                                                              | months                                                                                                |                                       |
| Select Source of Water                                               | Groundwater                                                    |                                                                                                       |                                       |
| Total Volume of Water Extracted in a Year                            | 1314000                                                        | meter <sup>3</sup> /year                                                                              |                                       |

**D. User chooses (yes/no) if the location of water extraction is in the risk identified quaternary watersheds:**

| Sub Watershed Multipliers |                                                 |                                                                     |          |                                                        |
|---------------------------|-------------------------------------------------|---------------------------------------------------------------------|----------|--------------------------------------------------------|
|                           | Watershed Sensitivity Category                  | Risk-Selected Quaternary Watersheds                                 | Category | Location Listed in Risk-Selected Quaternary Watershed? |
| 1                         | High Risk for <b>Surface Water</b> Quantity     | 0                                                                   | HIGH     | NO                                                     |
| 2                         | Moderate Risk for <b>Surface Water</b> Quantity | Eramosa Above Guelph, Whitemans Creek, McKenzie Creek               | MODERATE | NO                                                     |
| 3                         | High Risk for <b>Groundwater</b> Quantity       | Central Grand                                                       | HIGH     | NO                                                     |
| 4                         | Moderate Risk for <b>Groundwater</b> Quantity   | Canagagigue Creek, Upper Speed, Mill Creek, Big Creek, Irvine River | MODERATE | YES                                                    |

Select from List  
☒ YES  
☐ NO

**E. User chooses the seasonal severity category for the seasonal surcharge multiplier: (the consumptive use and groundwater use multiplier is calculated automatically based on user inputs in Step B)**

| Consumptive Use Multipliers |                          |            |
|-----------------------------|--------------------------|------------|
| Sector                      | Consumptive Use Category | Multiplier |
| Water Bottling              | High                     | 1.5        |

  

| Groundwater Use Multiplier Calculated: |      |
|----------------------------------------|------|
| Groundwater as Main Source             | 1.5  |
| Both GW and SW as Main Source          | 1.25 |
| Surface Water as Main Source           | 1    |

  

| Seasonal Surcharge Multiplier |      |
|-------------------------------|------|
| Seasonal Low Flow Severity    | High |
| Seasonal Multiplier           | 1.5  |

Select from List  
☒ High  
☐ Moderate  
☐ Low

## F. Special Sector Price Concession Factor:

Here a “Special” sector price concession factor can be entered for a discounted charge, value chosen between 0 (full discount or no charge) and 1 (no discount or full charge).

| All Year Final Water Charges                                    |                                  | Seasonal Surcharge (Based on add-on seasonal multiplier) |                                  |
|-----------------------------------------------------------------|----------------------------------|----------------------------------------------------------|----------------------------------|
| Total Volume Extracted                                          | 1314000 meter <sup>3</sup> /year | Total Volume Extracted                                   | 1314000 meter <sup>3</sup> /year |
| Provincial Base Unit Charge                                     | 0.0231 \$/ m <sup>3</sup>        | Provincial Base Unit Charge                              | 0.0231 \$/ m <sup>3</sup>        |
| Price Risk Multiplier (Subwatershed x Sector x Groundwater Use) | 3.375                            | Seasonal Surcharge (Based on add-on seasonal multiplier) | 5.0625                           |
| "Special" Sector Price Concession Factor                        | NO                               | "Special" Sector Price Concession Factor                 | NO                               |
| Enter Price Concession Factor                                   | Select from List<br>YES<br>NO    | Enter Price Concession Factor                            | Select from List<br>YES<br>NO    |
| Price Multiplier (not adjusted for Seasonal Surcharge)          | 3.375                            | Price Multiplier (for Low Flow Months)                   | 5.0625                           |

## G. Final Bulk Water Charges inclusive of All Price Multipliers:

| FINAL WATER CHARGES IN                                          |                                  | Grand River                                              | SUBWATERSHED                     |
|-----------------------------------------------------------------|----------------------------------|----------------------------------------------------------|----------------------------------|
| All Year Final Water Charges                                    |                                  |                                                          |                                  |
| Total Volume Extracted                                          | 1314000 meter <sup>3</sup> /year | Total Volume Extracted                                   | 1314000 meter <sup>3</sup> /year |
| Provincial Base Unit Charge                                     | 0.0231 \$/ m <sup>3</sup>        | Provincial Base Unit Charge                              | 0.0231 \$/ m <sup>3</sup>        |
| Price Risk Multiplier (Subwatershed x Sector x Groundwater Use) | 3.375                            | Seasonal Surcharge (Based on add-on seasonal multiplier) | 5.0625                           |
| "Special" Sector Price Concession Factor                        | NO                               | "Special" Sector Price Concession Factor                 | NO                               |
| Enter Price Concession Factor                                   | 1                                | Enter Price Concession Factor                            | 1                                |
| Price Multiplier (not adjusted for Seasonal Surcharge)          | 3.375                            | Price Multiplier (for Low Flow Months)                   | 5.0625                           |
|                                                                 |                                  | Number of Low Precipitation Months                       | 4                                |
|                                                                 |                                  | Total Bulk Water Charge                                  |                                  |
|                                                                 |                                  | Charges for Low Precipitation Months                     | 51172 \$/ year                   |
|                                                                 |                                  | Charges for Normal Precipitation Months                  | 68229 \$/ year                   |
|                                                                 |                                  | TOTAL                                                    | 119400 \$/ year                  |
|                                                                 |                                  | Average Price per m <sup>3</sup> for Permit Holder       | 0.0909 \$/m <sup>3</sup>         |
|                                                                 |                                  |                                                          | 90.87 \$/ Million Liters         |

### *Summary*

- (1) Total Volume Extracted: 1314000 m<sup>3</sup>/year
- (2) Base Provincial Unit Charge (without any multipliers): CAD 23.08/Million Liters
- (3) Price Multiplier (Location, Sector and Source Risks): 3.375
- (4) Seasonal Surcharge (seasonal multiplier for 4 months): 5.0625
- (5) Unit Water Extraction Charge for permit applicant (inclusive of all multipliers):  
CAD 90.87/Million Liters
- (6) Annual Total Provincial Bulk Water Extraction Charges: \$119400/year
